# Supplementary material for: Impact of zero-mark-up medicines policy on hospital revenue structure: a panel data analysis of 136 public tertiary hospitals in China, 2012–2020
Source: HighWire-hosted journal article supplement (doi:10.1136/bmjgh-2021-007089), 2021-11-01
Supplement: bmjgh-2021-007089supp001_data_supplement.pdf [file bmjgh-2021-007089supp001_data_supplement.pdf]

## SUPPLEMENTAL MATERIAL

**Annex 1** Numbers and distributions of sample hospitals started the implementation progressively

| Time of starting implementation | No. of hospitals | Location distribution                    | Affiliation distribution | Type of hospital distribution                                                                                                                                                         |
|---------------------------------|------------------|------------------------------------------|--------------------------|---------------------------------------------------------------------------------------------------------------------------------------------------------------------------------------|
| 2014                            | 3                | Eastern 3                                | All local                | General 1;TCM 1; MCH 1                                                                                                                                                                |
| 2015                            | 15               | Eastern 6;<br>Central 2;<br>Western 6    | All local                | General 5;TCM 5; MCH 5                                                                                                                                                                |
| 2016                            | 18               | Eastern 5;<br>Central 7;<br>Western 6    | Local 13;<br>Central 5   | General 10;TCM 4; MCH 4                                                                                                                                                               |
| 2017                            | 100              | Eastern 45;<br>Central 24;<br>Western 31 | Local 62;<br>Central 38  | General 41;TCM 21; MCH 22; Other specialty 16<br>(Oncology 3; Stomatology 6; Hematology 1;<br>Dermatology 1; Cardiovascular 1; Ophthalmology 1;<br>Plastic surgery 1, Occupational 1) |

**Annex 2** Overall effect estimation of the pseudo-implementation of the policy 1 and 2 years ahead

| Pseudo-implementation | Statistics                    | % medicines revenue | % medical service revenue | % government subsidy revenue |
|-----------------------|-------------------------------|---------------------|---------------------------|------------------------------|
| 1 year ahead          | Overall effect                | 0.0037              | 0.0046                    | -0.0083                      |
|                       | Cluster-robust standard error | 0.0091              | 0.0101                    | 0.0064                       |
|                       | <i>P</i> value                | 0.684               | 0.650                     | 0.200                        |
| 2 years ahead         | Overall effect                | 0.0132              | 0.00001                   | -0.0132                      |
|                       | Cluster-robust standard error | 0.0097              | 0.0108                    | 0.0082                       |
|                       | <i>P</i> value                | 0.177               | 0.999                     | 0.108                        |

**Annex 3** Sensitivity analysis of the dynamic effect estimation  
by controlling the province specific time trend and the region specific time trend

| Model    | % medicines revenue          | % medical service revenue | % government subsidy revenue |                    |
|----------|------------------------------|---------------------------|------------------------------|--------------------|
| Model 3a | -0.0333 (0.0089) ***         | 0.0339 (0.0100) ***       | 0.0006 (0.0076)              |                    |
| Model 3b | -0.0318 (0.0086) ***         | 0.0344 (0.0099) ***       | 0.0026 (0.0077)              |                    |
| Model 4a | The year of implementation   | -0.0399 (0.0193) *        | 0.1040 (0.0171) ***          | -0.0641 (0.0250) * |
|          | 1 year after implementation  | -0.0690 (0.0193) ***      | 0.1214 (0.0179) ***          | -0.0524 (0.0235) * |
|          | 2 years after implementation | -0.0954 (0.0194) ***      | 0.1155 (0.0183) ***          | -0.0201 (0.0203)   |
|          | 3 years after implementation | -0.1030 (0.0205) ***      | 0.1099 (0.0191) ***          | -0.0070 (0.0198)   |
|          | 4 years after implementation | -0.1191 (0.0253) ***      | 0.1111 (0.0237) ***          | 0.0080 (0.0271)    |
|          | 5 years after implementation | 0.1580 (0.0328) ***       | 0.0889 (0.0386) *            | 0.0690 (0.0513)    |
|          | 6 years after implementation | 0.1791 (0.0426) ***       | 0.1041 (0.0426) *            | 0.0750 (0.0620)    |
| Model 4b | The year of implementation   | -0.0664 (0.0140) ***      | 0.0752 (0.0168) ***          | -0.0088 (0.0125)   |
|          | 1 year after implementation  | -0.0931 (0.0131) ***      | 0.0944 (0.0158) ***          | -0.0014 (0.0133)   |
|          | 2 years after implementation | -0.1146 (0.0127) ***      | 0.0930 (0.0147) ***          | 0.0215 (0.0123)    |
|          | 3 years after implementation | -0.1152 (0.0122) ***      | 0.0948 (0.0137) ***          | 0.0204 (0.0117)    |
|          | 4 years after implementation | 0.1203 (0.0139) ***       | 0.1054 (0.0166) ***          | 0.0149 (0.0133)    |
|          | 5 years after implementation | -0.1481 (0.0153) ***      | 0.0948 (0.0240) ***          | 0.0534 (0.0255) *  |
|          | 6 years after implementation | -0.1699 (0.0158) ***      | 0.1383 (0.0230) ***          | 0.0316 (0.0157) *  |

**Notes:** Model 3a indicates inclusion of the province-specific time trend term in the hospital and time two-way fixed effect overall effect model (model 3), which is the same as the result when both the province-specific time trend term and the region-specific time trend term were included in model 3; model 3b indicates inclusion of the region-specific time trend term in the hospital and time two-way fixed effect model (model 3); model 4a indicates inclusion of the province-specific time trend term in the dynamic effect model (model 4), which is the same as the result when both the province-specific time trend term and the region-specific time trend term were included in model 4; Model 4b indicates inclusion of the region-specific time trend term in the dynamic effect model (Model 4). \*\*\*  $P < 0.001$ , \*\*  $P < 0.01$ , \*  $P < 0.05$ ; cluster-robust standard errors were within the parentheses.

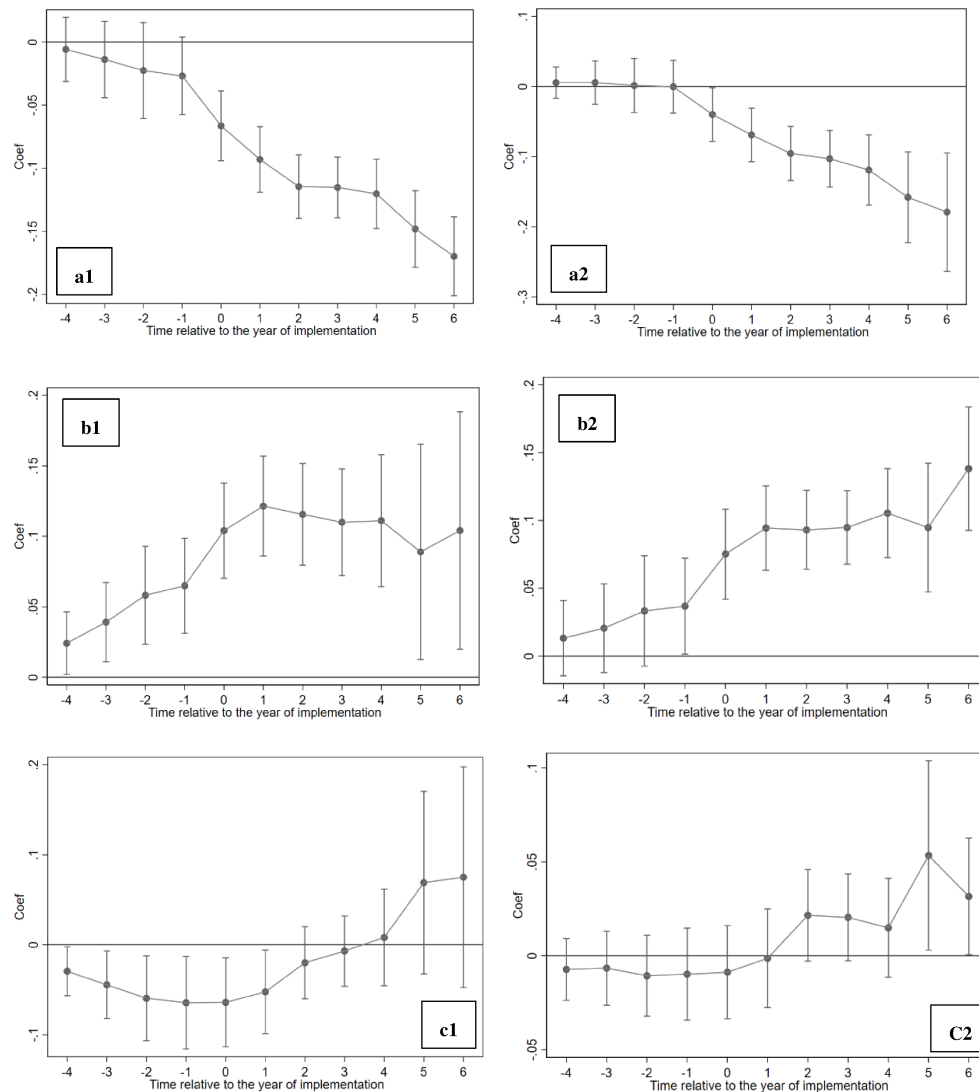

**Notes:** “a” indicates proportionate medicines revenue, “b” indicates proportionate medical service revenue, c indicates proportionate government subsidy revenue, 1 denotes controlling the province-specific time trend in model 4, 2 denotes controlling the region-specific time trend in model 4, the regression results by controlling the province-specific time trend, or by controlling both trends in model 4 were the same.

**Annex 4** Sensitivity analysis of the dynamic effect estimation  
by controlling the province-specific time trend and the region-specific time trend

## Annex 5 Sub-group analyses of the average treatment effect of the policy

## 5a Sub-group analyses of the average treatment effect of the policy by type of hospital

| Type of hospital(n)   | Model                                       | Measurement( $y_{it}$ )                  | No. of observation(n) | Coefficient( $\lambda$ ) | Cluster-robust standard error | P value      |
|-----------------------|---------------------------------------------|------------------------------------------|-----------------------|--------------------------|-------------------------------|--------------|
| General hospital (57) | Pooled regression model (Model 1)           | Proportionate medicines revenue          | 499                   | -0.1061                  | 0.0081                        | <0.001       |
|                       |                                             | Proportionate medical service revenue    | 499                   | 0.0942                   | 0.0094                        | <0.001       |
|                       |                                             | Proportionate government subsidy revenue | 499                   | 0.0120                   | 0.0048                        | 0.015        |
|                       | Hospital-level fixed effect model (Model 2) | Proportionate medicines revenue          | 499                   | -0.1074                  | 0.0078                        | <0.001       |
|                       |                                             | Proportionate medical service revenue    | 499                   | 0.0955                   | 0.0090                        | <0.001       |
|                       |                                             | Proportionate government subsidy revenue | 499                   | 0.0120                   | 0.0046                        | 0.012        |
|                       | Two-way fixed effect model (Model 3)        | Proportionate medicines revenue          | 499                   | -0.0322                  | 0.0080                        | <0.001       |
|                       |                                             | Proportionate medical service revenue    | 499                   | 0.0252                   | 0.0102                        | 0.017        |
|                       |                                             | Proportionate government subsidy revenue | 499                   | 0.0070                   | 0.0077                        | 0.363        |
| TCM hospital (31)     | Pooled regression model (Model 1)           | Proportionate medicines revenue          | 279                   | -0.0830                  | 0.0142                        | <0.001       |
|                       |                                             | Proportionate medical service revenue    | 279                   | 0.0806                   | 0.0174                        | <0.001       |
|                       |                                             | Proportionate government subsidy revenue | 279                   | 0.0024                   | 0.0096                        | 0.801        |
|                       | Hospital-level fixed effect model (Model 2) | Proportionate medicines revenue          | 279                   | -0.0830                  | 0.0134                        | <0.001       |
|                       |                                             | Proportionate medical service revenue    | 279                   | 0.0806                   | 0.0164                        | <0.001       |
|                       |                                             | Proportionate government subsidy revenue | 279                   | 0.0024                   | 0.0091                        | 0.790        |
|                       | Two-way fixed effect model (Model 3)        | Proportionate medicines revenue          | 279                   | -0.0312                  | 0.0227                        | <b>0.180</b> |
|                       |                                             | Proportionate medical service revenue    | 279                   | 0.0315                   | 0.0204                        | <b>0.134</b> |
|                       |                                             | Proportionate government subsidy revenue | 279                   | -0.0003                  | 0.0161                        | 0.985        |
| MCH hospital (33)     | Pooled regression model (Model 1)           | Proportionate medicines revenue          | 297                   | -0.0837                  | 0.0129                        | <0.001       |
|                       |                                             | Proportionate medical service revenue    | 297                   | 0.0956                   | 0.0126                        | <0.001       |

|                                      |                                             |                                             |                                          |         |         |        |       |
|--------------------------------------|---------------------------------------------|---------------------------------------------|------------------------------------------|---------|---------|--------|-------|
|                                      |                                             | Proportionate government subsidy revenue    | 297                                      | -0.0119 | 0.0103  | 0.253  |       |
| Specialty hospital (15)              | Hospital-level fixed effect model (Model 2) | Proportionate medicines revenue             | 297                                      | -0.0837 | 0.0123  | <0.001 |       |
|                                      |                                             | Proportionate medical service revenue       | 297                                      | 0.0956  | 0.0120  | <0.001 |       |
|                                      |                                             | Proportionate government subsidy revenue    | 297                                      | -0.0119 | 0.0097  | 0.228  |       |
|                                      | Two-way fixed effect model (Model 3)        | Proportionate medicines revenue             | 297                                      | -0.0328 | 0.0108  | 0.005  |       |
|                                      |                                             | Proportionate medical service revenue       | 297                                      | 0.0521  | 0.0156  | 0.002  |       |
|                                      |                                             | Proportionate government subsidy revenue    | 297                                      | -0.0192 | 0.0156  | 0.226  |       |
|                                      | Specialty hospital (15)                     | Pooled regression model (Model 1)           | Proportionate medicines revenue          | 135     | -0.0653 | 0.0163 | 0.001 |
|                                      |                                             |                                             | Proportionate medical service revenue    | 135     | 0.0588  | 0.0148 | 0.001 |
|                                      |                                             |                                             | Proportionate government subsidy revenue | 135     | 0.0065  | 0.0097 | 0.518 |
|                                      |                                             | Hospital-level fixed effect model (Model 2) | Proportionate medicines revenue          | 135     | -0.0653 | 0.0158 | 0.001 |
|                                      |                                             |                                             | Proportionate medical service revenue    | 135     | 0.0588  | 0.0144 | 0.001 |
|                                      |                                             |                                             | Proportionate government subsidy revenue | 135     | 0.0065  | 0.0095 | 0.507 |
| Two-way fixed effect model (Model 3) |                                             | Proportionate medicines revenue             | 135                                      | -0.0846 | 0.0202  | 0.001  |       |
|                                      |                                             | Proportionate medical service revenue       | 135                                      | 0.0641  | 0.0198  | 0.006  |       |
|                                      |                                             | Proportionate government subsidy revenue    | 135                                      | 0.0205  | 0.0243  | 0.414  |       |

## 5b Sub-group analyses of the average treatment effect of the policy by location of hospital

| Region (n)   | Model                                       | Measurement (y <sub>it</sub> )           | No. of observation (n) | Coefficient (λ) | Cluster-robust standard error | P value      |
|--------------|---------------------------------------------|------------------------------------------|------------------------|-----------------|-------------------------------|--------------|
| Eastern (59) | Pooled regression model (Model 1)           | Proportionate medicines revenue          | 527                    | -0.0846         | 0.0074                        | <0.001       |
|              |                                             | Proportionate medical service revenue    | 527                    | 0.0818          | 0.0084                        | <0.001       |
|              |                                             | Proportionate government subsidy revenue | 527                    | 0.0028          | 0.0068                        | 0.679        |
|              | Hospital-level fixed effect model (Model 2) | Proportionate medicines revenue          | 527                    | -0.0828         | 0.0074                        | <0.001       |
|              |                                             | Proportionate medical service revenue    | 527                    | 0.0787          | 0.0082                        | <0.001       |
|              |                                             | Proportionate government subsidy revenue | 527                    | 0.0041          | 0.0066                        | 0.536        |
|              | Two-way fixed effect model (Model 3)        | Proportionate medicines revenue          | 527                    | -0.0382         | 0.0115                        | 0.001        |
|              |                                             | Proportionate medical service revenue    | 527                    | 0.0325          | 0.0136                        | 0.020        |
|              |                                             | Proportionate government subsidy revenue | 527                    | 0.0057          | 0.0074                        | 0.445        |
| Central (34) | Pooled regression model (Model 1)           | Proportionate medicines revenue          | 306                    | -0.1017         | 0.0092                        | <0.001       |
|              |                                             | Proportionate medical service revenue    | 306                    | 0.0910          | 0.0109                        | <0.001       |
|              |                                             | Proportionate government subsidy revenue | 306                    | 0.0106          | 0.0061                        | 0.093        |
|              | Hospital-level fixed effect model (Model 2) | Proportionate medicines revenue          | 306                    | -0.1016         | 0.0090                        | <0.001       |
|              |                                             | Proportionate medical service revenue    | 306                    | 0.0914          | 0.0108                        | <0.001       |
|              |                                             | Proportionate government subsidy revenue | 306                    | 0.0102          | 0.0060                        | 0.097        |
|              | Two-way fixed effect model (Model 3)        | Proportionate medicines revenue          | 306                    | -0.0273         | 0.0138                        | 0.057        |
|              |                                             | Proportionate medical service revenue    | 306                    | 0.0252          | 0.0113                        | 0.032        |
|              |                                             | Proportionate government subsidy revenue | 306                    | 0.0022          | 0.0077                        | 0.779        |
| Western (43) | Pooled regression model (Model 1)           | Proportionate medicines revenue          | 377                    | -0.0925         | 0.0137                        | <0.001       |
|              |                                             | Proportionate medical service revenue    | 377                    | 0.0959          | 0.0145                        | <0.001       |
|              |                                             | Proportionate government subsidy revenue | 377                    | -0.0035         | 0.0069                        | 0.621        |
|              | Hospital-level fixed effect model (Model 2) | Proportionate medicines revenue          | 377                    | -0.0942         | 0.0134                        | <0.001       |
|              |                                             | Proportionate medical service revenue    | 377                    | 0.0979          | 0.0142                        | <0.001       |
|              |                                             | Proportionate government subsidy revenue | 377                    | -0.0036         | 0.0068                        | 0.599        |
|              | Two-way fixed effect model (Model 3)        | Proportionate medicines revenue          | 377                    | -0.0237         | 0.0205                        | <b>0.255</b> |
|              |                                             | Proportionate medical service revenue    | 377                    | 0.0398          | 0.0235                        | <b>0.097</b> |
|              |                                             | Proportionate government subsidy revenue | 377                    | -0.0162         | 0.0207                        | 0.439        |

## 5c Sub-group analyses of the average treatment effect of the policy by affiliation of hospital

| Affiliation of hospital (n)           | Model                                       | Measurement ( $y_{it}$ )                 | No. of observation (n) | Coefficient ( $\lambda$ ) | Cluster-robust standard error | P value |
|---------------------------------------|---------------------------------------------|------------------------------------------|------------------------|---------------------------|-------------------------------|---------|
| Affiliated to central government (43) | Pooled regression model (Model 1)           | Proportionate medicines revenue          | 378                    | -0.0809                   | 0.0085                        | <0.001  |
|                                       |                                             | Proportionate medical service revenue    | 378                    | 0.0737                    | 0.0089                        | <0.001  |
|                                       |                                             | Proportionate government subsidy revenue | 378                    | 0.0072                    | 0.0061                        | 0.241   |
|                                       | Hospital-level fixed effect model (Model 2) | Proportionate medicines revenue          | 378                    | -0.0829                   | 0.0084                        | <0.001  |
|                                       |                                             | Proportionate medical service revenue    | 378                    | 0.0762                    | 0.0087                        | <0.001  |
|                                       |                                             | Proportionate government subsidy revenue | 378                    | 0.0067                    | 0.0057                        | 0.250   |
|                                       | Two-way fixed effect model (Model 3)        | Proportionate medicines revenue          | 378                    | -0.0301                   | 0.0111                        | 0.010   |
|                                       |                                             | Proportionate medical service revenue    | 378                    | 0.0240                    | 0.0116                        | 0.044   |
|                                       |                                             | Proportionate government subsidy revenue | 378                    | 0.0060                    | 0.0073                        | 0.414   |
| Affiliated to local government (93)   | Pooled regression model (Model 1)           | Proportionate medicines revenue          | 832                    | -0.0953                   | 0.0076                        | <0.001  |
|                                       |                                             | Proportionate medical service revenue    | 832                    | 0.0938                    | 0.0084                        | <0.001  |
|                                       |                                             | Proportionate government subsidy revenue | 832                    | 0.0015                    | 0.0051                        | 0.768   |
|                                       | Hospital-level fixed effect model (Model 2) | Proportionate medicines revenue          | 832                    | -0.0950                   | 0.0074                        | <0.001  |
|                                       |                                             | Proportionate medical service revenue    | 832                    | 0.0933                    | 0.0082                        | <0.001  |
|                                       |                                             | Proportionate government subsidy revenue | 832                    | 0.0017                    | 0.0050                        | 0.733   |
|                                       | Two-way fixed effect model (Model 3)        | Proportionate medicines revenue          | 832                    | -0.0277                   | 0.0095                        | 0.004   |
|                                       |                                             | Proportionate medical service revenue    | 832                    | 0.0337                    | 0.0109                        | 0.003   |
|                                       |                                             | Proportionate government subsidy revenue | 832                    | -0.0059                   | 0.0088                        | 0.500   |
